# Supplementary material for: Cobalamins and the spectrochemical series
Source: Royal Society of Chemistry journal article supplement (doi:10.1039/b806927a), 2008-01-01
Supplement: b806927a.pdf [file b806927a.pdf]

**Table S1** Parameters (absorbance  $\alpha_i$ , wavenumber  $\nu_i$  and half-width  $\Delta_i$ ) obtained from Gaussian deconvolution of the visible-NIR spectra of cobalamins (X-cbl)

| Ligand X         | Solvent            | Band | $\alpha_i$ | Error  | $\bar{\nu}_i/cm^{-1}$ | Error | $\Delta_i/cm^{-1}$ | Error  |
|------------------|--------------------|------|------------|--------|-----------------------|-------|--------------------|--------|
| F <sup>-</sup>   | CH <sub>3</sub> OH | 1    | 0.6289     | 0.0026 | 18462.3               | 0.6   | 436.81             | 1.05   |
|                  |                    | 2    | 0.0774     | 0.0133 | 18560.0               | 436.8 | 2099.16            | 129.03 |
|                  |                    | 3    | 1.5622     | 0.0184 | 19531.8               | 2.1   | 1061.68            | 4.43   |
|                  |                    | 4    | 0.3258     | 0.0039 | 21551.0               | 2.7   | 630.14             | 3.63   |
|                  |                    | 5    | 0.7674     | 0.0028 | 24069.2               | 12.0  | 1725.25            | 13.16  |
| Cl <sup>-</sup>  | H <sub>2</sub> O   | 1    | 0.0984     | 0.0005 | 14562.9               | 17.8  | 1971.00            | 9.71   |
|                  |                    | 2    | 0.6834     | 0.0017 | 18299.2               | 0.5   | 479.44             | 0.65   |
|                  |                    | 3    | 1.4240     | 0.0066 | 19397.5               | 2.4   | 1129.10            | 2.18   |
|                  |                    | 4    | 0.3578     | 0.0038 | 21363.9               | 3.0   | 719.58             | 3.27   |
|                  |                    | 5    | 0.1754     | 0.0022 | 23924.0               | 1.7   | 397.38             | 2.94   |
|                  |                    | 6    | 0.7410     | 0.0155 | 26430.1               | 224.1 | 3302.09            | 154.43 |
| Cl <sup>-</sup>  | CH <sub>3</sub> OH | 1    | 0.1113     | 0.0003 | 15340.6               | 12.2  | 1767.69            | 9.56   |
|                  |                    | 2    | 0.6977     | 0.0029 | 18301.8               | 0.8   | 415.17             | 1.09   |
|                  |                    | 3    | 1.4836     | 0.0031 | 19279                 | 6.9   | 1045.21            | 3.09   |
|                  |                    | 4    | 0.609      | 0.0046 | 21471.1               | 9.4   | 950.78             | 10.12  |
|                  |                    | 5    | 0.693      | 0.0014 | 24091.7               | 4.2   | 798.62             | 6.88   |
|                  |                    | 6    | 0.327      | 0.0147 | 25127.3               | 21.5  | 299.8              | 13.29  |
| Br <sup>-</sup>  | H <sub>2</sub> O   | 1    | 0.1030     | 0.0008 | 13810.8               | 9.6   | 1793.72            | 9.23   |
|                  |                    | 2    | 0.6593     | 0.0016 | 18076.7               | 0.4   | 440.26             | 0.54   |
|                  |                    | 3    | 1.4120     | 0.0018 | 19076.1               | 2.3   | 985.35             | 1.33   |
|                  |                    | 4    | 0.4671     | 0.0023 | 21001.5               | 3.1   | 802.80             | 2.95   |
|                  |                    | 5    | 0.2031     | 0.0011 | 23650.5               | 0.9   | 437.81             | 1.84   |
|                  |                    | 6    | 3.1075     | 0.3063 | 36276.8               | 720.1 | 6846.52            | 190.02 |
| Br <sup>-</sup>  | CH <sub>3</sub> OH | 1    | 0.1349     | 0.0002 | 14621.4               | 4.0   | 1650.73            | 4.57   |
|                  |                    | 2    | 0.7299     | 0.0015 | 18078.7               | 0.5   | 392.54             | 0.64   |
|                  |                    | 3    | 1.3616     | 0.0014 | 19098.8               | 2.0   | 1010.33            | 1.15   |
|                  |                    | 4    | 0.3712     | 0.0026 | 21098.7               | 2.8   | 680.98             | 3.55   |
|                  |                    | 5    | 0.1532     | 0.0013 | 23501.2               | 2.2   | 339.02             | 3.03   |
|                  |                    | 6    | 0.7404     | 0.0039 | 25620.4               | 49.0  | 2542.99            | 34.28  |
| I <sup>-</sup>   | H <sub>2</sub> O   | 1    | 0.1963     | 0.0002 | 13388.2               | 3.0   | 1642.29            | 2.42   |
|                  |                    | 2    | 0.6959     | 0.0024 | 17592.2               | 0.4   | 411.82             | 0.67   |
|                  |                    | 3    | 1.0915     | 0.0015 | 18636.7               | 1.7   | 855.37             | 1.83   |
|                  |                    | 4    | 0.2460     | 0.0011 | 20391.7               | 2.9   | 624.40             | 2.45   |
|                  |                    | 5    | 0.0836     | 0.0007 | 22707.8               | 2.3   | 410.63             | 3.61   |
|                  |                    | 6    | 1.0041     | 0.0002 | 24541.5               | 8.6   | 3763.57            | 8.59   |
| I <sup>-</sup>   | CH <sub>3</sub> OH | 1    | 0.1993     | 0.0002 | 13758.3               | 2.2   | 1505.24            | 1.65   |
|                  |                    | 2    | 0.6943     | 0.0016 | 17643.3               | 0.2   | 398.39             | 0.44   |
|                  |                    | 3    | 1.1671     | 0.0011 | 18720.6               | 0.9   | 858.88             | 1.38   |
|                  |                    | 4    | 0.2653     | 0.0008 | 20480.4               | 1.7   | 592.20             | 1.59   |
|                  |                    | 5    | 0.0537     | 0.0005 | 22695.1               | 2.4   | 381.80             | 3.97   |
|                  |                    | 6    | 0.7993     | 0.0004 | 23373.1               | 4.7   | 3237.70            | 6.44   |
| H <sub>2</sub> O | H <sub>2</sub> O   | 1    | 0.0477     | 0.0003 | 15271.3               | 26.6  | 1687.77            | 21.16  |
|                  |                    | 2    | 0.6077     | 0.0028 | 18718.2               | 1.2   | 509.77             | 1.55   |
|                  |                    | 3    | 1.6138     | 0.0010 | 20007.9               | 5.4   | 1325.01            | 2.85   |
|                  |                    | 4    | 0.2939     | 0.0058 | 22062.9               | 5.8   | 712.38             | 8.63   |
|                  |                    | 5    | 0.7549     | 0.0007 | 24501.5               | 2.5   | 1033.24            | 6.31   |

|                                    |                                               |             |                      |              |                                         |              |                          |              |
|------------------------------------|-----------------------------------------------|-------------|----------------------|--------------|-----------------------------------------|--------------|--------------------------|--------------|
| H <sub>2</sub> O                   | CH <sub>3</sub> OH/<br>H <sub>2</sub> O 80/20 | 1           | 0.0490               | 0.0003       | 15576.8                                 | 35.0         | 1851.49                  | 24.76        |
|                                    |                                               | 2           | 0.5982               | 0.0031       | 18745.9                                 | 1.2          | 522.48                   | 1.62         |
|                                    | 3                                             | 1.6150      | 0.0011               | 20014.0      | 5.6                                     | 1289.69      | 2.92                     |              |
|                                    | 4                                             | 0.3282      | 0.0059               | 22109.3      | 5.8                                     | 746.73       | 8.68                     |              |
|                                    | 5                                             | 0.7503      | 0.0006               | 24545.8      | 2.5                                     | 1014.65      | 6.74                     |              |
| H <sub>2</sub> O                   | CH <sub>3</sub> CN/<br>H <sub>2</sub> O 80/20 | 1           | 0.0535               | 0.0003       | 15417.6                                 | 30.6         | 1836.95                  | 22.11        |
|                                    |                                               | 2           | 0.6023               | 0.0032       | 18676.6                                 | 1.3          | 543.53                   | 1.69         |
|                                    | 3                                             | 1.6212      | 0.0011               | 19986.6      | 5.6                                     | 1315.36      | 2.88                     |              |
|                                    | 4                                             | 0.2940      | 0.0056               | 22093.0      | 6.0                                     | 740.64       | 9.10                     |              |
|                                    | 5                                             | 0.7479      | 0.0006               | 24538.5      | 2.4                                     | 1008.10      | 6.27                     |              |
| <b>Ligand X</b>                    | <b>Solvent</b>                                | <b>Band</b> | <b>α<sub>i</sub></b> | <b>Error</b> | <b><math>\bar{\nu}_i/cm^{-1}</math></b> | <b>Error</b> | <b>Δ/cm<sup>-1</sup></b> | <b>Error</b> |
| CH <sub>3</sub> OH                 | CH <sub>3</sub> OH                            | 1           | 0.0853               | 0.0002       | 15427.2                                 | 12.3         | 1865.26                  | 9.45         |
|                                    |                                               | 2           | 0.4510               | 0.0035       | 18354.0                                 | 1.2          | 458.92                   | 1.67         |
|                                    |                                               | 3           | 1.4729               | 0.0088       | 19233.2                                 | 9.6          | 984.26                   | 3.25         |
|                                    |                                               | 4           | 0.8326               | 0.0085       | 21167.6                                 | 14.3         | 1041.16                  | 9.96         |
|                                    |                                               | 5           | 0.7448               | 0.0004       | 24444.7                                 | 2.2          | 1161.45                  | 5.84         |
| (CH <sub>3</sub> ) <sub>2</sub> SO | (CH <sub>3</sub> ) <sub>2</sub> SO            | 1           | 0.0994               | 0.0004       | 15340.3                                 | 12.9         | 1436.82                  | 10.94        |
|                                    |                                               | 2           | 0.6239               | 0.0033       | 18320.3                                 | 1.1          | 417.75                   | 1.55         |
|                                    |                                               | 3           | 1.5391               | 0.0014       | 19344.3                                 | 5.3          | 1062.66                  | 2.80         |
|                                    |                                               | 4           | 0.6207               | 0.0050       | 21430.4                                 | 5.2          | 791.48                   | 5.52         |
|                                    |                                               | 5           | 0.7601               | 0.0008       | 24312.1                                 | 3.0          | 1227.61                  | 7.62         |
| CH <sub>3</sub> COOH               | CH <sub>3</sub> COOH                          | 1           | 0.1054               | 0.0003       | 15237.5                                 | 15.3         | 1750.10                  | 12.39        |
|                                    |                                               | 2           | 0.6905               | 0.0031       | 18303.1                                 | 1.0          | 426.44                   | 1.35         |
|                                    |                                               | 3           | 1.3898               | 0.0013       | 19362.2                                 | 4.9          | 1086.82                  | 2.74         |
|                                    |                                               | 4           | 0.4691               | 0.0039       | 21461.8                                 | 5.2          | 751.50                   | 5.58         |
|                                    |                                               | 5           | 0.6257               | 0.0008       | 24303.3                                 | 3.2          | 1166.07                  | 7.10         |
| OH <sup>-</sup>                    | H <sub>2</sub> O                              | 1           | 0.7195               | 0.0018       | 18327.4                                 | 0.5          | 455.08                   | 0.72         |
|                                    |                                               | 2           | 1.5363               | 0.0047       | 19360.7                                 | 1.3          | 1031.31                  | 1.66         |
|                                    |                                               | 3           | 0.6238               | 0.0033       | 23280.8                                 | 94.5         | 3165.27                  | 35.04        |
|                                    |                                               | 4           | 0.2145               | 0.0028       | 21413.6                                 | 2.6          | 536.24                   | 3.57         |
|                                    |                                               | 5           | 0.2149               | 0.0152       | 23758.4                                 | 8.7          | 392.62                   | 8.73         |
|                                    |                                               | 6           | 0.2408               | 0.0136       | 25022.9                                 | 35.7         | 735.32                   | 88.99        |
| SCN <sup>-</sup> /NCS <sup>-</sup> | H <sub>2</sub> O                              | 1           | 0.1130               | 0.0002       | 15332.5                                 | 9.2          | 1925.31                  | 5.82         |
|                                    |                                               | 2           | 0.7287               | 0.0029       | 18138.4                                 | 0.7          | 618.81                   | 0.97         |
|                                    |                                               | 3           | 1.3488               | 0.0011       | 19497.1                                 | 3.3          | 1187.89                  | 2.03         |
|                                    |                                               | 4           | 0.2801               | 0.0024       | 21385.0                                 | 2.6          | 690.95                   | 2.85         |
|                                    |                                               | 5           | 0.7663               | 0.0002       | 24504.0                                 | 2.0          | 1562.86                  | 3.26         |
| SCN <sup>-</sup> /NCS <sup>-</sup> | CH <sub>3</sub> OH                            | 1           | 0.1007               | 0.0004       | 15695.7                                 | 19.5         | 1882.09                  | 11.14        |
|                                    |                                               | 2           | 0.6188               | 0.0028       | 18258.8                                 | 0.9          | 565.87                   | 1.24         |
|                                    |                                               | 3           | 1.3791               | 0.0013       | 19542.6                                 | 4.0          | 1236.34                  | 2.38         |
|                                    |                                               | 4           | 0.2674               | 0.0033       | 21539.9                                 | 3.8          | 696.84                   | 4.55         |
|                                    |                                               | 5           | 0.8284               | 0.0003       | 24561.8                                 | 3.1          | 1522.28                  | 5.20         |
| SC(NH <sub>2</sub> ) <sub>2</sub>  | H <sub>2</sub> O                              | 1           | 0.1447               | 0.0002       | 14722.5                                 | 3.9          | 1710.02                  | 2.83         |
|                                    |                                               | 2           | 0.4621               | 0.0016       | 17825.3                                 | 0.6          | 453.89                   | 0.83         |
|                                    |                                               | 3           | 1.3185               | 0.0017       | 18809.7                                 | 2.6          | 1027.87                  | 1.05         |
|                                    |                                               | 4           | 0.7629               | 0.0003       | 24839.5                                 | 11.4         | 2955.35                  | 17.97        |
|                                    |                                               | 5           | 0.4158               | 0.0032       | 20764.1                                 | 3.0          | 765.63                   | 3.35         |
|                                    |                                               | 6           | 0.0754               | 0.0006       | 23152.7                                 | 2.2          | 330.33                   | 2.97         |
| SC(NH <sub>2</sub> ) <sub>2</sub>  | CH <sub>3</sub> OH                            | 1           | 0.1363               | 0.0001       | 14738.1                                 | 2.7          | 1614.66                  | 1.96         |
|                                    |                                               | 2           | 0.5223               | 0.0009       | 17950.2                                 | 0.4          | 465.97                   | 0.50         |

|                                             |                    |             |                      |              |                                         |              |                                      |              |
|---------------------------------------------|--------------------|-------------|----------------------|--------------|-----------------------------------------|--------------|--------------------------------------|--------------|
|                                             |                    | 3           | 1.2040               | 0.0013       | 18994.4                                 | 1.3          | 1089.09                              | 0.70         |
|                                             |                    | 4           | 0.2624               | 0.0014       | 20955.4                                 | 1.5          | 647.62                               | 2.16         |
|                                             |                    | 5           | 0.0846               | 0.0005       | 23208.3                                 | 1.6          | 350.44                               | 2.08         |
|                                             |                    | 6           | 0.7177               | 0.0003       | 24962.7                                 | 11.3         | 3035.73                              | 13.77        |
| SO <sub>3</sub> <sup>2-</sup>               | H <sub>2</sub> O   | 1           | 0.0936               | 0.0296       | 18967.6                                 | 690.2        | 2011.19                              | 188.76       |
|                                             |                    | 2           | 0.7641               | 0.0039       | 18145.7                                 | 0.5          | 446.42                               | 0.94         |
|                                             |                    | 3           | 1.7290               | 0.0320       | 19331.0                                 | 3.6          | 976.28                               | 5.90         |
|                                             |                    | 4           | 0.5179               | 0.0167       | 21166.9                                 | 4.4          | 765.89                               | 5.26         |
|                                             |                    | 5           | 1.1357               | 0.0068       | 24043.4                                 | 16.9         | 1615.16                              | 14.33        |
| S <sub>2</sub> O <sub>3</sub> <sup>2-</sup> | H <sub>2</sub> O   | 1           | 0.1230               | 0.0044       | 15585.3                                 | 42.4         | 1541.09                              | 31.18        |
|                                             |                    | 2           | 0.9836               | 0.0599       | 17957.9                                 | 32.7         | 687.06                               | 8.38         |
|                                             |                    | 3           | 0.7133               | 0.2022       | 19061.0                                 | 35.0         | 730.86                               | 55.57        |
|                                             |                    | 4           | 0.6004               | 0.0647       | 20365.7                                 | 224.5        | 1069.85                              | 148.05       |
|                                             |                    | 5           | 0.1654               | 0.0303       | 22877.0                                 | 81.6         | 845.94                               | 69.98        |
|                                             |                    | 6           | 1.4849               | 0.2780       | 32021.4                                 | 1515.7       | 6494.90                              | 349.57       |
| <b>Ligand X</b>                             | <b>Solvent</b>     | <b>Band</b> | <b>α<sub>i</sub></b> | <b>Error</b> | <b><math>\bar{\nu}_i/cm^{-1}</math></b> | <b>Error</b> | <b>Δ<sub>i/cm<sup>-1</sup></sub></b> | <b>Error</b> |
| SeCN <sup>-</sup>                           | H <sub>2</sub> O   | 1           | 0.2059               | 0.0001       | 14553.2                                 | 1.4          | 1584.68                              | 1.32         |
|                                             |                    | 2           | 0.4473               | 0.0014       | 17573.2                                 | 0.5          | 422.47                               | 0.68         |
|                                             |                    | 3           | 1.4768               | 0.0040       | 18451.7                                 | 3.9          | 914.61                               | 1.26         |
|                                             |                    | 4           | 0.7015               | 0.0046       | 20269.1                                 | 6.4          | 970.22                               | 5.58         |
|                                             |                    | 5           | 0.1540               | 0.0010       | 22995.6                                 | 1.1          | 395.33                               | 1.87         |
|                                             |                    | 6           | 0.9073               | 0.0002       | 24595.7                                 | 2.9          | 1995.93                              | 7.53         |
| SeCN <sup>-</sup>                           | CH <sub>3</sub> OH | 1           | 0.1880               | 0.0001       | 14691.8                                 | 1.4          | 1639.63                              | 1.28         |
|                                             |                    | 2           | 0.3858               | 0.0012       | 17639.5                                 | 0.5          | 417.49                               | 0.65         |
|                                             |                    | 3           | 1.2885               | 0.0045       | 18511.1                                 | 4.0          | 903.89                               | 1.23         |
|                                             |                    | 4           | 0.6567               | 0.0043       | 20287.0                                 | 6.9          | 996.03                               | 5.94         |
|                                             |                    | 5           | 0.1381               | 0.0009       | 23042.1                                 | 1.0          | 401.53                               | 1.84         |
|                                             |                    | 6           | 0.8038               | 0.0002       | 24610.5                                 | 2.8          | 1926.38                              | 7.45         |
| OCN <sup>-</sup>                            | H <sub>2</sub> O   | 1           | 0.0550               | 0.0005       | 15667.5                                 | 29.8         | 1030.06                              | 31.73        |
|                                             |                    | 2           | 0.6176               | 0.0042       | 18328.2                                 | 1.3          | 458.28                               | 1.95         |
|                                             |                    | 3           | 1.7088               | 0.0015       | 19404.6                                 | 5.4          | 1200.07                              | 3.59         |
|                                             |                    | 4           | 0.5231               | 0.0058       | 21622.4                                 | 5.3          | 784.31                               | 6.59         |
|                                             |                    | 5           | 0.8068               | 0.0008       | 24301.6                                 | 2.6          | 1137.17                              | 6.95         |
| OCN <sup>-</sup>                            | CH <sub>3</sub> OH | 1           | 0.0719               | 0.0008       | 15807.3                                 | 33.8         | 1035.24                              | 30.98        |
|                                             |                    | 2           | 0.5991               | 0.0049       | 18364.0                                 | 1.6          | 433.19                               | 2.30         |
|                                             |                    | 3           | 1.7267               | 0.0019       | 19405.7                                 | 7.5          | 1198.37                              | 5.11         |
|                                             |                    | 4           | 0.5465               | 0.0074       | 21673.0                                 | 8.8          | 846.42                               | 9.67         |
|                                             |                    | 5           | 0.8012               | 0.0010       | 24367.9                                 | 2.9          | 966.11                               | 6.56         |
| NO <sub>2</sub> <sup>-</sup>                | H <sub>2</sub> O   | 1           | 0.1361               | 0.0018       | 16097.2                                 | 74.0         | 1650.20                              | 64.68        |
|                                             |                    | 2           | 0.5956               | 0.0048       | 18541.1                                 | 1.5          | 409.50                               | 2.18         |
|                                             |                    | 3           | 1.7026               | 0.0456       | 19508.0                                 | 33.4         | 1176.25                              | 14.70        |
|                                             |                    | 4           | 0.6352               | 0.0353       | 21718.0                                 | 97.0         | 1242.71                              | 58.02        |
|                                             |                    | 5           | 0.8324               | 0.0088       | 24306.1                                 | 7.6          | 615.87                               | 8.89         |
|                                             |                    | 6           | 0.4559               | 0.0398       | 25153.1                                 | 37.0         | 280.06                               | 22.19        |
| N <sub>3</sub> <sup>-</sup>                 | H <sub>2</sub> O   | 1           | 0.1187               | 0.0010       | 15630.4                                 | 10.6         | 1273.47                              | 6.27         |
|                                             |                    | 2           | 0.6601               | 0.0018       | 18246.4                                 | 0.6          | 445.43                               | 0.79         |
|                                             |                    | 3           | 1.5668               | 0.0070       | 19205.8                                 | 2.1          | 1116.92                              | 1.90         |
|                                             |                    | 4           | 0.3018               | 0.0035       | 21266.3                                 | 2.6          | 624.82                               | 3.53         |
|                                             |                    | 5           | 0.1603               | 0.0027       | 23716.6                                 | 2.6          | 401.51                               | 4.56         |
|                                             |                    | 6           | 0.9443               | 0.0091       | 25837.3                                 | 131.2        | 3167.76                              | 103.57       |
